# Supplementary material for: Mutagenicity and DNA damage studies of N-acyloxy-N-alkoxyamides ? the role of electrophilic nitrogenElectronic supplementary information (ESI) available: a partial sequence of the pBR322 DNA, solvolysis rate constants and primary bimolecular rate constants. See http://www.rsc.org/suppdata/ob/b3/b301618h/
Source: Royal Society of Chemistry journal article supplement (doi:10.1039/b301618h), 2003-01-01
Supplement: b301618h.doc [file b301618h.doc]

***Supplementary Data.***

**DNA Sequence:**

A partial sequence of the 375 base pair *EcoRI* to *BamHI* fragment of plasmid pBR322 DNA used in DNA damage studies is presented below.

| 31 |  | 41 |  | 51 |  | 61 |  | | 71 |
| --- | --- | --- | --- | --- | --- | --- | --- | --- | --- |
| GCTTTAATGC  3'-CGAAATTACG |  | GGTAGTTTAT  CCATCAAATA |  | CACAGTTAAA  GTGTCAATTT |  | TTGCTAACGC  AACGATTGCG |  | | AGTCAGGCAC  TCAGTCCGTG |
|  |  |  |  |  |  |  |  | |  |
| 81 |  | 91 |  | 101 |  | 111 |  | | 121 |
| CGTGTATGAA  GCACATACTT |  | ATCTAACAAT  TAGATTGTTA |  | GCGCTCATCG  CGCGAGTAGC |  | TCATCCTCGG  AGTAGGAGCC |  | CACCGTCACC  GTGGCAGTGG | |
|  |  |  |  |  |  |  |  | |  |
| 131 |  | 141 |  | 151 |  | 161 |  | |  |
| CTGGATGCTG  GACCTACGAC |  | TAGGCATAGG  ATCCGTATCC |  | CTTGGGTTAT  GAACCCAATA |  | GCCGGTACTG  CGGCCATGAC-5' |  | |  |

# Acid-catalysed solvolysis rate data:

# Table S4. Rate constants for the acid-catalysed solvolysis of *N*-butoxy-*N*-benzoyloxybenzamide 6 and *N*-acetoxy- *N*-butoxy-2-naphthamide 11.

| Compound | T/K | /lmol–1s–1 | r |
| --- | --- | --- | --- |
|  |  |  |  |
| **6** | 298 | 1.039 | 0.9999 |
|  | 303 | 2.120 | 0.9999 |
|  | 313 | 9.472 | 0.9998 |
|  | 323 | 40.848 | 0.9983 |
| **11** | 293 | 0.253 | 0.9958 |
|  | 303 | 0.742 | 0.9995 |
|  | 313 | 3.008 | 0.9997 |
|  | 323 | 9.497 | 0.9993 |

**Bimolecular reaction rate data:**

*Table S5. Rate constants for the bimolecular reaction of N-methylaniline and N-acetoxy-N-butoxy-2-naphthamide* ***6****, N-acetoxy-N-benzyloxybenzamide* ***10*** *and N-butoxy-N-benzoyloxybenzamide* ***11****.*

| Compound | T/K | /lmol-1s-1 | r |
| --- | --- | --- | --- |
| **6** | 288 | 118.90 | 0.9984 |
|  | 293 | 197.75 | 0.9973 |
|  | 298 | 281.83 | 0.9987 |
|  | 303 | 400.85 | 0.9991 |
|  | 308 | 697.42 | 0.9985 |
| **10** | 273 | 14.45 | 0.9992 |
|  | 283 | 25.54 | 0.9971 |
|  | 293 | 66.48 | 0.9995 |
|  | 303 | 126.18 | 0.9828 |
| **11** | 253 | 35.41 | 0.9826 |
|  | 263 | 67.50 | 0.9949 |
|  | 273 | 254.82 | 0.9862 |
|  | 283 | 397.11 | 0.9930 |
